# Supplementary material for: A covalency-aided electrochemical mechanism for CO2 reduction: the synergistic effect of copper and boron dual active sites drives the formation of a high-efficiency ethanol product
Source: Royal Society of Chemistry journal article supplement (doi:10.1039/d3nr04288j), 2023-01-01
Supplement: d3nr04288j1.pdf [file d3nr04288j1.pdf]

Supporting Information for

**“Covalency-aided electrochemical mechanism for CO<sub>2</sub> reduction: synergistic effect of copper and boron dual active sites drives high-efficiency ethanol product”**

Shiyan Wang,<sup>\*a</sup> Longlu Wang,<sup>a</sup> Xianjun Zhu,<sup>a</sup> Yanling Zhuang,<sup>a</sup> Xianghong Niu<sup>b</sup> and Qiang Zhao<sup>\*a</sup>

<sup>a</sup> College of Electronic and Optical Engineering & College of Flexible Electronics (Future Technology), Nanjing University of Posts and Telecommunications, Nanjing 210023, China.

<sup>b</sup> College of Science, Nanjing University of Posts and Telecommunications, Nanjing 210023, China.

\* E-mail: shiyan.wang@njupt.edu.cn; iamqzhao@njupt.edu.cn.

## Computational details

The binding energy ( $E_b$ ) was calculated to estimate the strength of atom/molecule-surface interaction.  $E_b$  could be calculated by:

$$E_b = E_{\text{system}} - E_{\text{surf}} - E_{\text{adsorb}}$$

where  $E_{\text{system}}$ ,  $E_{\text{surf}}$ , and  $E_{\text{adsorb}}$  are the energy of adsorption structure, surface, and adsorbent, respectively.

The formation energy of B doping Cu(100) catalyst was calculated by following formula:

$$E_f = E_{\text{B-Cu(100)}} - E_{\text{Cu(100)}} - \mu_B + \mu_{\text{Cu}}$$

where  $E_{\text{B-Cu(100)}}$  is the total energies of B doping at the defective Cu(100) catalyst.  $E_{\text{Cu(100)}}$  is the energy of pure Cu(100) catalyst.  $\mu_B$  and  $\mu_{\text{Cu}}$  are the chemical potentials of each B and Cu atom in bulk crystal, respectively.

The Gibbs reaction free energy change ( $\Delta G$ ) of each elementary reaction was calculated by:

$$\Delta G = \Delta E + \Delta \text{ZPE} - T\Delta S$$

where  $\Delta E$  is the reaction energy determined from DFT, and  $\Delta \text{ZPE}$  is the difference in zero-point energies due to the reaction between the adsorbed and the gas phase by setting  $\text{H}_2\text{O}$  and  $\text{H}_2$  in the gas phase as reference states.  $\Delta S$  is the change in entropy, computed using DFT calculations of the vibrational frequencies and standard tables for gas phase molecules. All values of  $\Delta G$  were computed at  $T = 298 \text{ K}$ , and  $\text{pH} = 0$ .

The limiting potential ( $U_L$ ) was calculated as  $U_L = -\Delta G_{\text{max}}/e$ , where the  $\Delta G_{\text{max}}$  obtained from the maximum free energy among all elementary steps of the minimum-energy pathway.

### Zero-point energy (ZPE) and entropy corrections (TS)

The entropies of the gaseous molecules were taken from the NIST Chemistry WebBook and the zero-point energy (ZPE) was calculated according to:

$$E_{\text{ZPE}} = \sum_{i=1}^{3N} \frac{h\nu_i}{2}$$

The entropy change for adsorbed intermediates was calculated within the harmonic approximation:

$$\Delta S_{\text{ads}}(0 \rightarrow T, P^0) = S_{\text{vib}} = \sum_{i=1}^{3N} \left[ \frac{N_A h \nu_i}{T(e^{h\nu_i/K_B T} - 1)} - R \ln(1 - e^{-h\nu_i/K_B T}) \right]$$

Where  $\nu_i$  is DFT-calculated normal-mode frequency for species of  $3N$  degree of freedom

( $N$ =number of atoms) adsorbed on B-Cu(100) surface,  $N_A$  is the Avogadro's constant ( $6.022 \times 10^{23} \text{ mol}^{-1}$ ),  $h$  is the Planck's constant ( $6.626 \times 10^{-34} \text{ J s}$ ), and  $k_B$  is the Boltzmann constant ( $1.38 \times 10^{-23} \text{ J K}^{-1}$ ),  $R$  is the ideal gas constant ( $8.314 \text{ J K}^{-1} \text{ mol}^{-1}$ ), and  $T$  is the system temperature, and  $T=298\text{K}$  in this work.

The activation energy barrier ( $E_{\text{barrier}}$ ) for the C–C coupling was calculated according to the following formula

$$E_{\text{barrier}} = E_{\text{TS}} - E_{\text{IS}}$$

where  $E_{\text{IS}}$  and  $E_{\text{TS}}$  are the free energy and the energy of the initial state and the transition state, respectively.

**Table S1.** Free energy corrections for gas-phase species.

| Molecule                         | ZPE (eV) | TΔS (eV) |
|----------------------------------|----------|----------|
| CO <sub>2</sub>                  | 0.31     | 0.66     |
| CO                               | 0.13     | 0.61     |
| H <sub>2</sub>                   | 0.28     | 0.40     |
| H <sub>2</sub> O                 | 0.57     | 0.67     |
| C <sub>2</sub> H <sub>4</sub>    | 1.36     | 0.71     |
| C <sub>2</sub> H <sub>5</sub> OH | 2.11     | 0.83     |

**Table S2.** Calculated the energy of DFT ( $E_{\text{DFT}}$ ), zero point energies (ZPE) and entropy (TS) of different adsorption species.

| Figures   | Adsorption Species                  | $E_{\text{DFT}}$ (eV) | ZPE (eV) | TS (eV) |
|-----------|-------------------------------------|-----------------------|----------|---------|
| Figure 3b | B-Cu(100)                           | -247.88               |          |         |
|           | OCO*                                | -271.69               | 0.33     | 0.12    |
|           | OCOH*                               | -275.37               | 0.63     | 0.16    |
|           | CO*                                 | -264.49               | 0.21     | 0.13    |
|           | CHO*                                | -267.91               | 0.48     | 0.14    |
|           | HCOH*                               | -271.29               | 0.79     | 0.11    |
|           | CH*                                 | -260.68               | 0.35     | 0.05    |
|           | CH <sub>2</sub> *                   | -264.47               | 0.63     | 0.08    |
|           | CH <sub>3</sub> *                   | -268.43               | 0.93     | 0.13    |
|           | CH <sub>4</sub>                     | -272.13               | 1.21     | 0.31    |
| Figure 4c | COCO*                               | -279.60               | 0.43     | 0.20    |
|           | CHOCO*                              | -283.45               | 0.71     | 0.21    |
|           | CHOCOH*                             | -287.40               | 1.03     | 0.22    |
|           | CH <sub>2</sub> OHCO*               | -291.31               | 1.34     | 0.25    |
|           | CH <sub>2</sub> CO*                 | -280.72               | 0.91     | 0.15    |
|           | CH <sub>3</sub> CO*                 | -284.86               | 1.22     | 0.20    |
|           | CH <sub>3</sub> COH*                | -288.07               | 1.51     | 0.24    |
|           | CH <sub>3</sub> CHOH*               | -291.97               | 1.82     | 0.22    |
|           | CH <sub>3</sub> CH <sub>2</sub> OH* | -295.62               | 2.16     | 0.31    |
|           | CHOCO*                              | -282.94               | 0.69     | 0.20    |
|           | CHOCHO*                             | -287.04               | 1.01     | 0.22    |
|           | CH <sub>2</sub> OCHO*               | -291.07               | 1.35     | 0.17    |
|           | CH <sub>2</sub> OHCHO*              | -294.90               | 1.67     | 0.20    |
|           | CH <sub>2</sub> CHO*                | -284.18               | 1.18     | 0.20    |
|           | CH <sub>2</sub> CH <sub>2</sub> O*  | -288.28               | 1.52     | 0.14    |

|                  |                                     |         |      |      |
|------------------|-------------------------------------|---------|------|------|
| <b>Figure 4d</b> | CH <sub>3</sub> CH <sub>2</sub> O*  | -291.99 | 1.83 | 0.26 |
|                  | CH <sub>2</sub> CH <sub>2</sub> OH* | -291.93 | 1.84 | 0.21 |
|                  | CH <sub>2</sub> CH <sub>2</sub> *   | -280.24 | 1.39 | 0.24 |
|                  | CH <sub>3</sub> CH <sub>2</sub> OH* | -295.62 | 2.16 | 0.31 |
| <b>Figure 5a</b> | 2B-Cu(100)                          | -249.02 |      |      |
|                  | 2OCO*                               | -297.09 | 0.65 | 0.29 |
|                  | 2COOH*                              | -304.57 | 1.28 | 0.30 |
|                  | 2CO*                                | -282.51 | 0.44 | 0.22 |
|                  | TS                                  | -282.10 | 0.44 | 0.20 |
|                  | COCO*                               | -282.45 | 0.45 | 0.18 |
|                  | 3B-Cu(100)                          | -249.96 |      |      |
|                  | 3OCO*                               | -322.31 | 0.98 | 0.41 |
|                  | 3COOH*                              | -333.54 | 1.91 | 0.51 |
|                  | 3CO*                                | -300.41 | 0.65 | 0.38 |
|                  | TS                                  | -300.24 | 0.71 | 0.21 |
|                  | CO*+COCO*                           | -300.37 | 0.65 | 0.30 |
| <b>Figure 5b</b> | 2CO*                                | -282.51 | 0.44 | 0.22 |
|                  | CO*+CHO*                            | -286.08 | 0.72 | 0.20 |
|                  | TS                                  | -285.61 | 0.65 | 0.29 |
|                  | CHOCO*                              | -286.43 | 0.77 | 0.14 |
|                  | 3CO*                                | -300.41 | 0.65 | 0.38 |
|                  | 2CO*+CHO*                           | -304.02 | 0.93 | 0.35 |
|                  | TS                                  | -303.85 | 0.94 | 0.28 |
|                  | CO*+CHOCO*                          | -304.50 | 0.99 | 0.23 |

**Table S3.** The Bader charge of the B, and the average Bader charge of nearby Cu atoms.

|           | <b>B-Cu(100)</b> | <b>2B-Cu(100)</b> | <b>3B-Cu(100)</b> |
|-----------|------------------|-------------------|-------------------|
| <b>Cu</b> | -0.13            | -0.11             | -0.10             |
| <b>B</b>  | 0.36             | 0.30              | 0.32              |

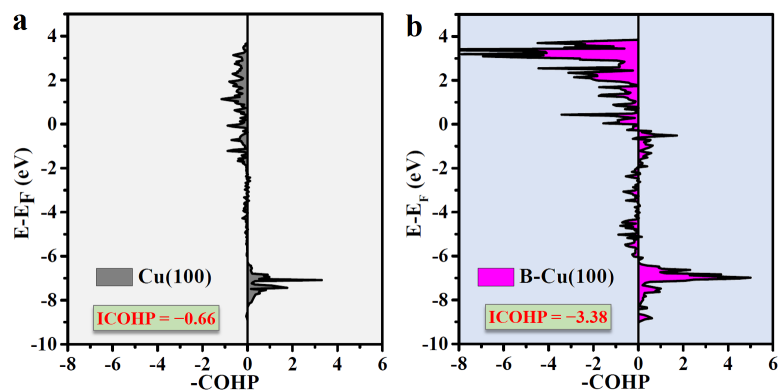

**Figure S1.** Projected crystal orbital Hamilton population ( $-\text{COHP}$ ) bonding analysis of CO adsorbed on (a) pristine Cu(100) and (b) B-Cu(100), and the corresponding integrated COHP (ICOHP) value.

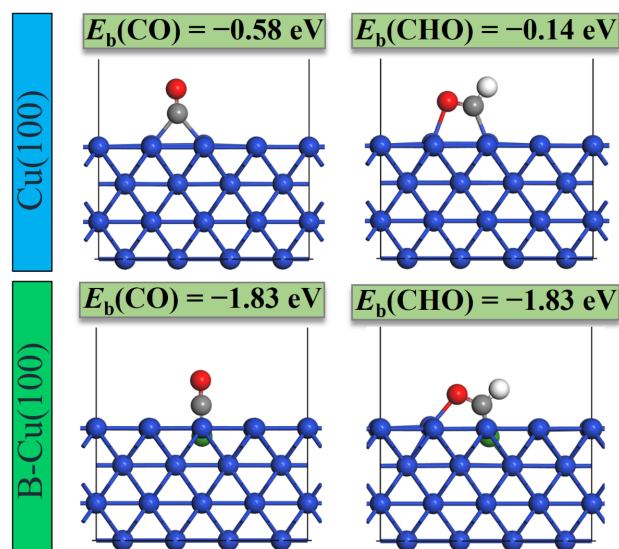

**Figure S2.** Adsorption geometries and energies of CO\* and CHO\* on pristine Cu(100) and B-Cu(100).

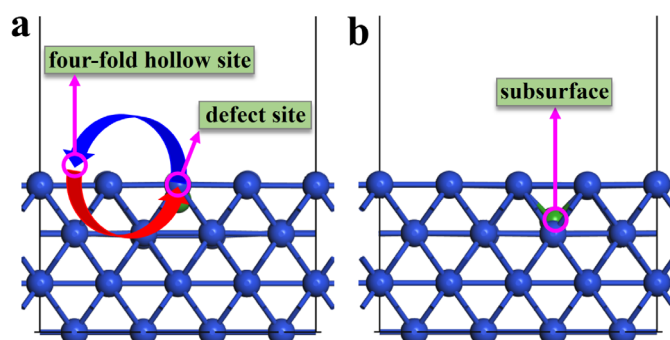

**Figure S3.** Optimized geometry structures of the B atom dopants at the defect Cu(100) (a) surface and (b) subsurface. Blue arrow: diffusion of the B atom from the defect sites to the four-fold hollow site of Cu. Red arrow: B atom from the four-fold hollow site of Cu to the defect site.

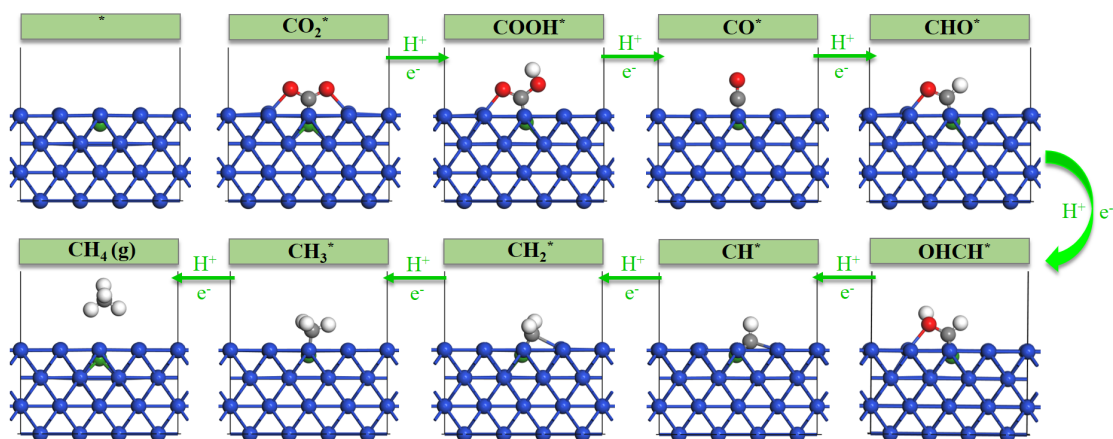

**Figure S4.** Optimized geometric of various intermediates for CO<sub>2</sub> reduction to CH<sub>4</sub> on B-Cu(100).

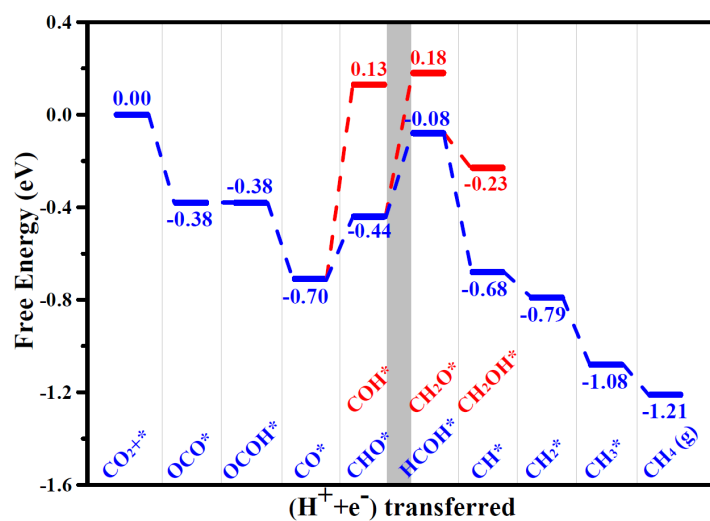

**Figure S5.** Free energy diagram of CO<sub>2</sub> reduction into CH<sub>4</sub> on B-Cu(100) catalyst. Red lines represent a competitive reaction and product selectivity.

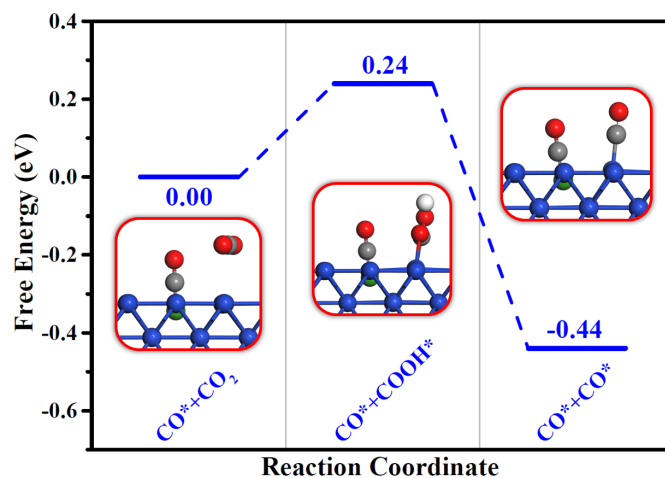

**Figure S6.** Adsorption structure and free energy diagrams for CO\* + CO<sub>2</sub> conversion to CO\* + CO\* on B-Cu(100).

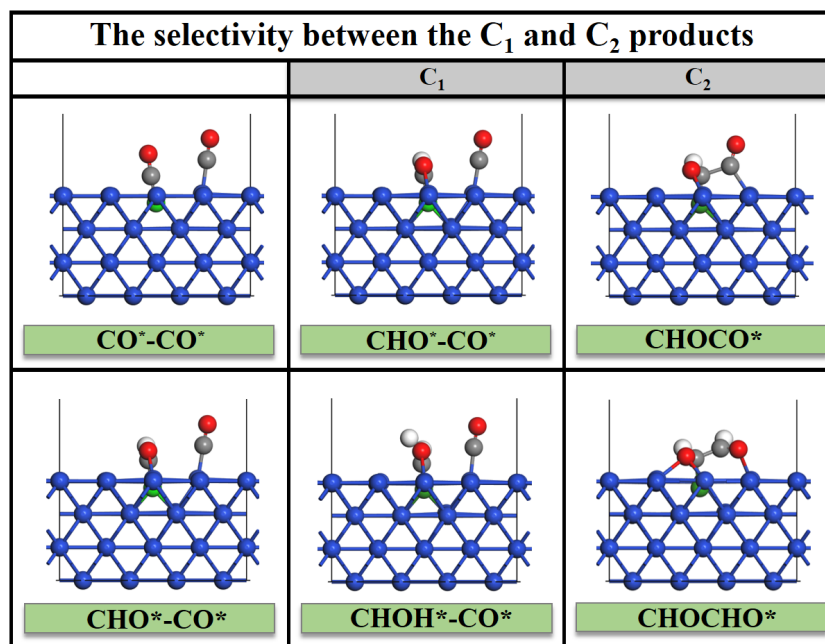

**Figure S7.** Optimized structure of the selectivity between the C<sub>1</sub> and C<sub>2</sub> products on B-Cu(100).

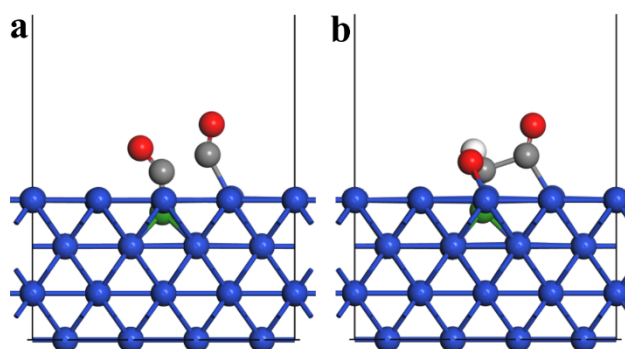

**Figure S8.** The atomic configurations of the transition state for **(a)** CO-CO and **(b)** CHO-CO coupling processes on B-Cu(100).

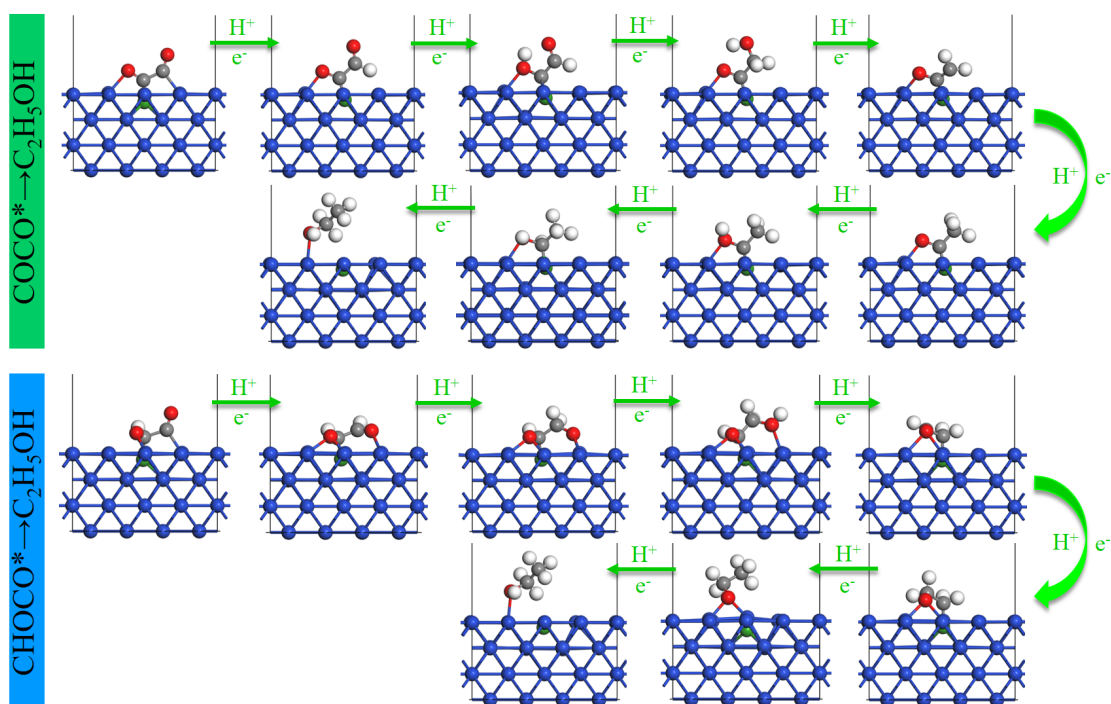

**Figure S9.** Optimized geometric of various intermediates for the hydrogenation  $\text{COCO}^*$  into  $\text{C}_2\text{H}_5\text{OH}$  and  $\text{CHOCO}^*$  into  $\text{C}_2\text{H}_5\text{OH}$ .

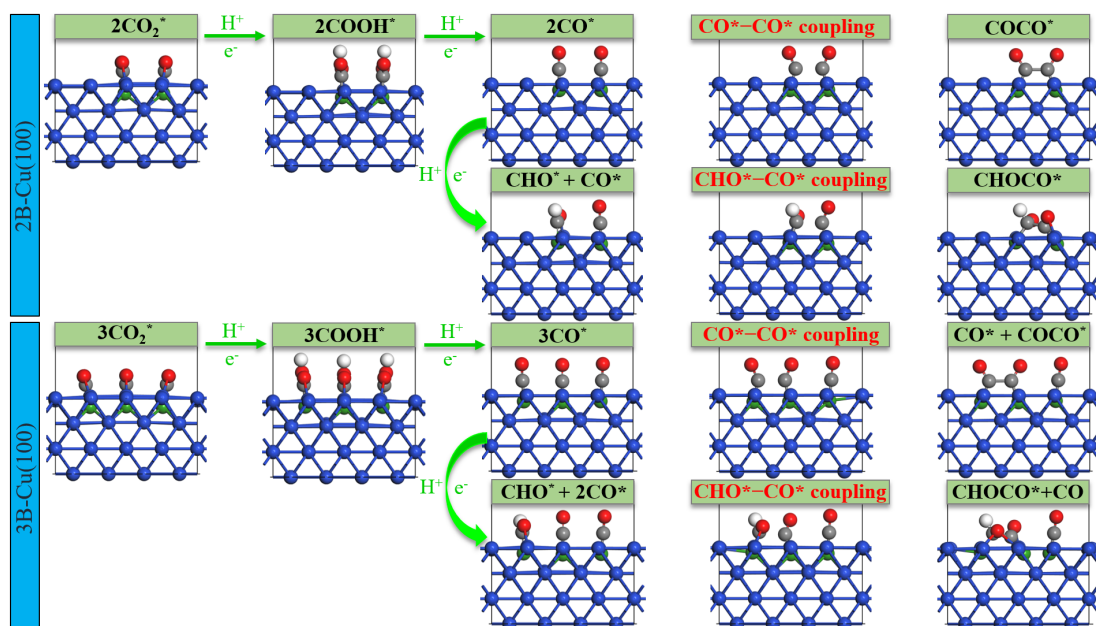

**Figure S10.** Optimized geometric of various intermediates for  $\text{CO}_2^*$  reduction to  $\text{CO}^*$  and two separated  $\text{CO}^*$  dimerization to  $\text{COCO}^*$  ( $\text{CO}^*-\text{CO}^*$  coupling),  $\text{CO}^*$  hydrogenation to  $\text{CHO}^*$  and  $\text{CO}^*$  with  $\text{CHO}^*$  dimerization to  $\text{CHOCO}^*$  ( $\text{CHO}^*-\text{CO}^*$  coupling) on 2B-Cu(100) and 3B-Cu(100).

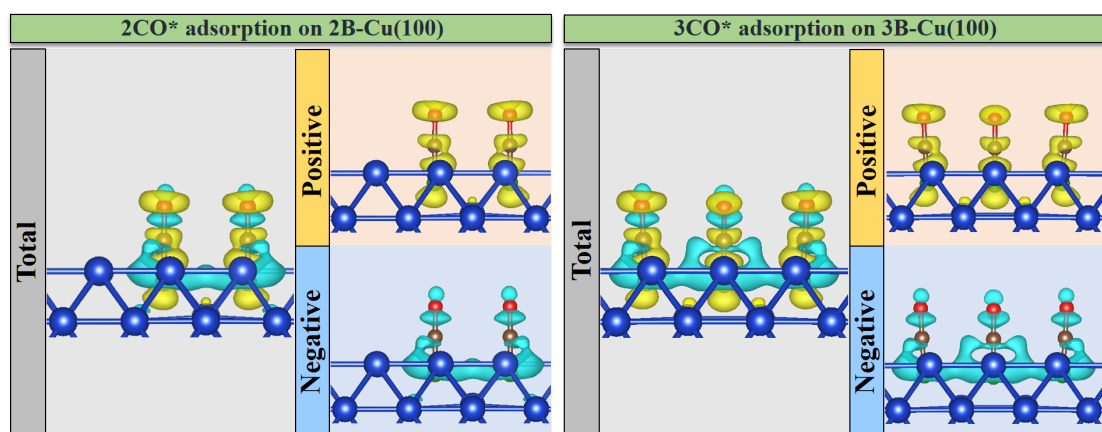

**Figure S11.** Charge density difference of CO\* adsorbed on 2B-Cu(100) and 3B-Cu(100). The isosurface value is set to be  $0.002 \text{ e}\text{\AA}^{-3}$ . Yellow denotes electron accumulation and cyan denotes electron depletion.
